# Supplementary material
Source: MDPI journal article supplement (https://www.mdpi.com/2304-6740/11/6/247)
Supplement: s1 [file s1]

## Supplementary materials

### Synthesis of CuAl-LDHs by Co-Precipitation and Mechanochemical Methods and Selective Hydrogenation Catalysts Based on Them

Olga B. Belskaya<sup>1\*</sup>, Elena N. Terekhova<sup>1</sup>, Oksana V. Gorbunova<sup>1</sup>, Ivan V. Muromtsev<sup>1</sup>, Mikhail V. Trenikhin<sup>1</sup>, Aleksei N. Salanov<sup>2</sup>, Vladimir A. Likholobov<sup>2</sup>.

<sup>1</sup>Center of New Chemical Technologies BIC, Neftezhavodskaya Str., 54, 644540 Omsk, Russian Federation

<sup>2</sup>Boreskov Institute of Catalysis, Siberian Branch, Russian Academy of Sciences, prosp. Akademika Lavrentieva 5, 630090 Novosibirsk, Russian Federation

\* Corresponding author: Olga B. Belskaya.

Present address: Center of New Chemical Technologies BIC, Neftezhavodskaya Str., 54, 644040 Omsk, Russia.

E-mail address: obelska@ihcp.ru

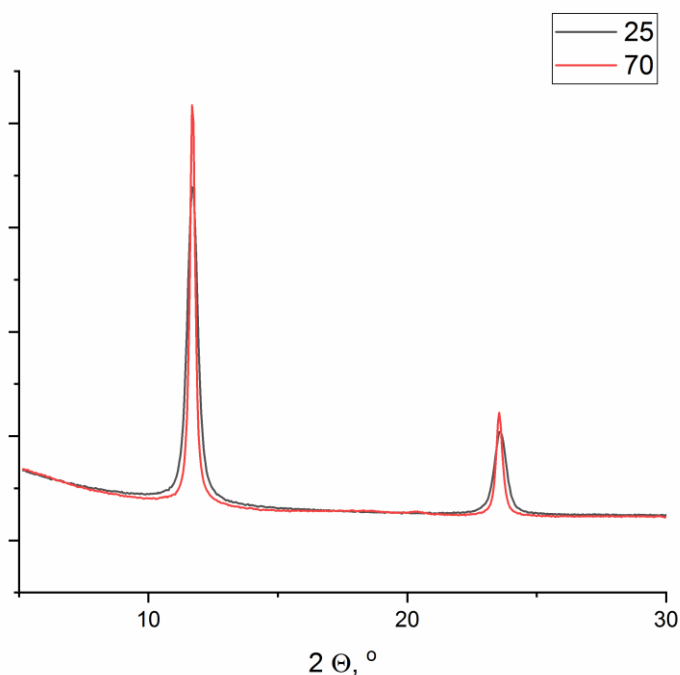

**Figure S1.** Diffraction patterns of the sample synthesized by co-precipitation at the  $\text{CO}_3^{2-}/\text{Al}^{3+}$  ratio equal to 0.76, pH 9, at different aging temperatures

**Table S1.** Results of local EDX analysis (by scanning electron microscopy)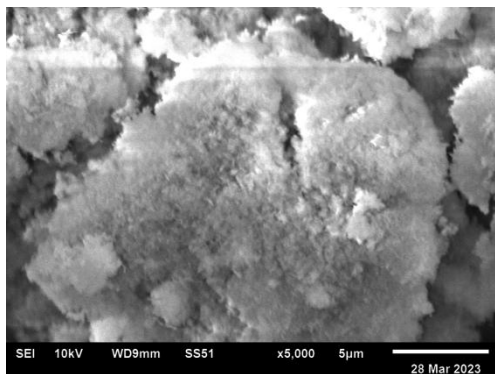

|            | Content, wt. % |       |       |       |             |       |       |       |
|------------|----------------|-------|-------|-------|-------------|-------|-------|-------|
|            | CuAl-<br>ma    | O     | Al    | Cu    | CuAl-<br>cp | O     | Al    | Cu    |
| Spectrum 1 |                | 29.09 | 11.30 | 59.60 |             | 38.53 | 9.65  | 51.82 |
| Spectrum 2 |                | 31.84 | 10.38 | 57.78 |             | 25.51 | 13.53 | 60.95 |
| Spectrum 3 |                | 31.88 | 10.77 | 57.35 |             | 30.75 | 12.04 | 57.20 |
| Spectrum 4 |                | 31.61 | 10.52 | 57.87 |             | 36.76 | 9.63  | 53.61 |
| Mean       |                | 31.11 | 10.74 | 58.15 |             | 32.89 | 11.21 | 55.90 |

**Table S2.** Microstructural parameters of CuAl-LDHs and CuAlO<sub>x</sub> mixed oxides.

| Sample                    | Spacegroup | <i>c</i> , nm | <i>a</i> , nm | CSR, nm |
|---------------------------|------------|---------------|---------------|---------|
| CuAl-2-cp                 | P2/m       | 2.261         | 0.304         | -       |
| CuAl-2-ma                 | P2/m       | 2.268         | 0.305         | -       |
| CuAlO <sub>x</sub> -2-cp* | C2/c       | 0.512         | 0.472         | 14.2    |
| CuAlO <sub>x</sub> -2-ma* | C2/c       | 0.511         | 0.473         | 10.2    |

\*- samples were calcined at 550 °C

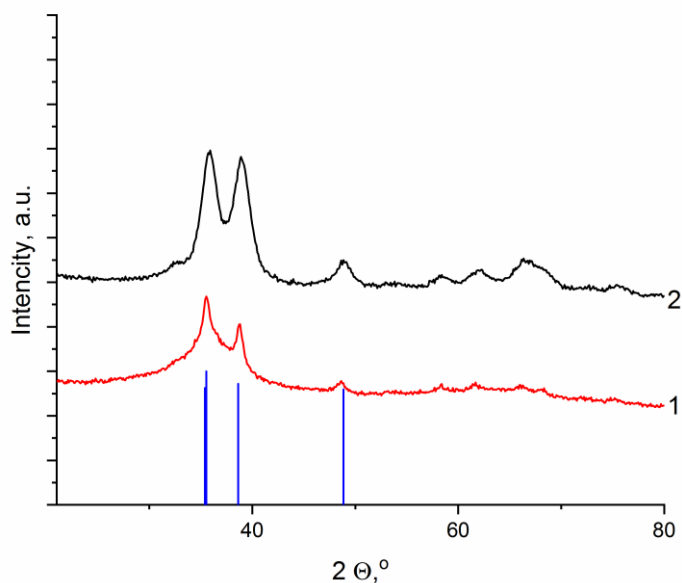

**Figure S2.** Diffraction patterns of the samples calcined at 550 °C (1) - obtained by co-precipitation and (2) - mechanical activation (blue line – basic reflections of CuO, PDF file No. 01-080-0076).
